# Supplementary material for: Bioinformatic Analyses Identify a Prognostic Autophagy-Related Long Non-coding RNA Signature Associated With Immune Microenvironment in Diffuse Gliomas
Source: Front Cell Dev Biol. 2021 Jun 15;9:694633. doi: 10.3389/fcell.2021.694633 (PMC8239411; doi:10.3389/fcell.2021.694633)
Supplement: Supplementary file 9 [file Table_4.XLSX]

## Sheet: Sheet1
id	HR	HR.95L	HR.95H	pvalue
AC011899.2	3.08271	2.55903	3.71355	2.10875e-32
AC125611.3	1.57012	1.48597	1.65904	5.48689e-58
AC048382.6	0.293318	0.224776	0.382759	1.68424e-19
AC010319.4	4.00038	3.20567	4.99211	1.32336e-34
AC026401.3	2.19671	1.97018	2.44929	1.3711e-45
AGAP2-AS1	1.60065	1.51504	1.6911	3.86619e-63
AC002116.2	18.8304	12.4135	28.5645	2.29841e-43
AC008669.1	0.203974	0.16117	0.258145	5.95805e-40
AC064875.1	1.78218	1.64906	1.92603	3.27837e-48
AC092718.4	2.60797	2.26708	3.00012	5.12921e-41
AL117332.1	4.83063	3.88375	6.00838	1.90423e-45
AL354919.2	2.1768	1.92566	2.46069	1.64938e-35
AL355974.2	1.77897	1.63924	1.93062	2.48887e-43
AL391834.1	0.392391	0.33614	0.458056	2.15816e-32
LINC01638	4.14869	3.37661	5.0973	8.80125e-42
ZFPM2-AS1	2.26733	1.98466	2.59026	1.95203e-33
BASP1-AS1	0.0792575	0.0439972	0.142776	3.12665e-17
SNHG18	2.2011	1.99237	2.43171	2.54713e-54
AF131216.3	0.508843	0.451528	0.573434	1.55464e-28
AL445231.1	28.0763	15.7953	49.906	6.37054e-30
HOXC-AS1	1.78182	1.63084	1.94679	1.95902e-37
HOXD-AS2	1.75083	1.54839	1.97973	4.10167e-19
LINC01224	2.19399	1.9202	2.50683	7.10721e-31
LINC01561	0.388097	0.331687	0.454101	3.41658e-32
AC092111.1	0.466277	0.404534	0.537443	6.43021e-26
DNAJC3-DT	0.349115	0.279301	0.43638	2.36194e-20
LINC00941	2.59777	2.27086	2.97175	5.37102e-44
AC018648.1	0.320093	0.260239	0.393712	4.03292e-27
AC108134.2	5.44395	4.11555	7.20112	1.64143e-32
LINC00968	4.32112	3.38469	5.51664	7.61049e-32
LINC02345	4.09486	3.26154	5.14109	6.21783e-34
AC010729.1	3.39281	2.81076	4.09539	4.43516e-37
LINC01127	2.49248	2.05851	3.01795	8.19299e-21
PKN2-AS1	6.77394	4.68964	9.7846	2.05264e-24
AC055874.1	2.54061	2.23264	2.89106	2.07767e-45
AC023024.1	0.338674	0.271293	0.422792	1.11332e-21
AL133330.1	6.66083	4.41165	10.0567	1.86537e-19
AC096586.1	0.582038	0.489698	0.69179	8.21937e-10
